# Supplementary material for: Validation of Diesel Fraction Content in Heavy Oils Measured by High Temperature Simulated Distillation and Physical Vacuum Distillation by Performance of Commercial Distillation Test and Process Simulation
Source: MDPI journal article supplement (doi:10.3390/app122211824), 2022-11-21
Supplement: s1 [file s1]

**Figure S1:** FCCPT Stabilization Section outlet stream summation to make-up the K-101 feed composition for Simulation Case 1

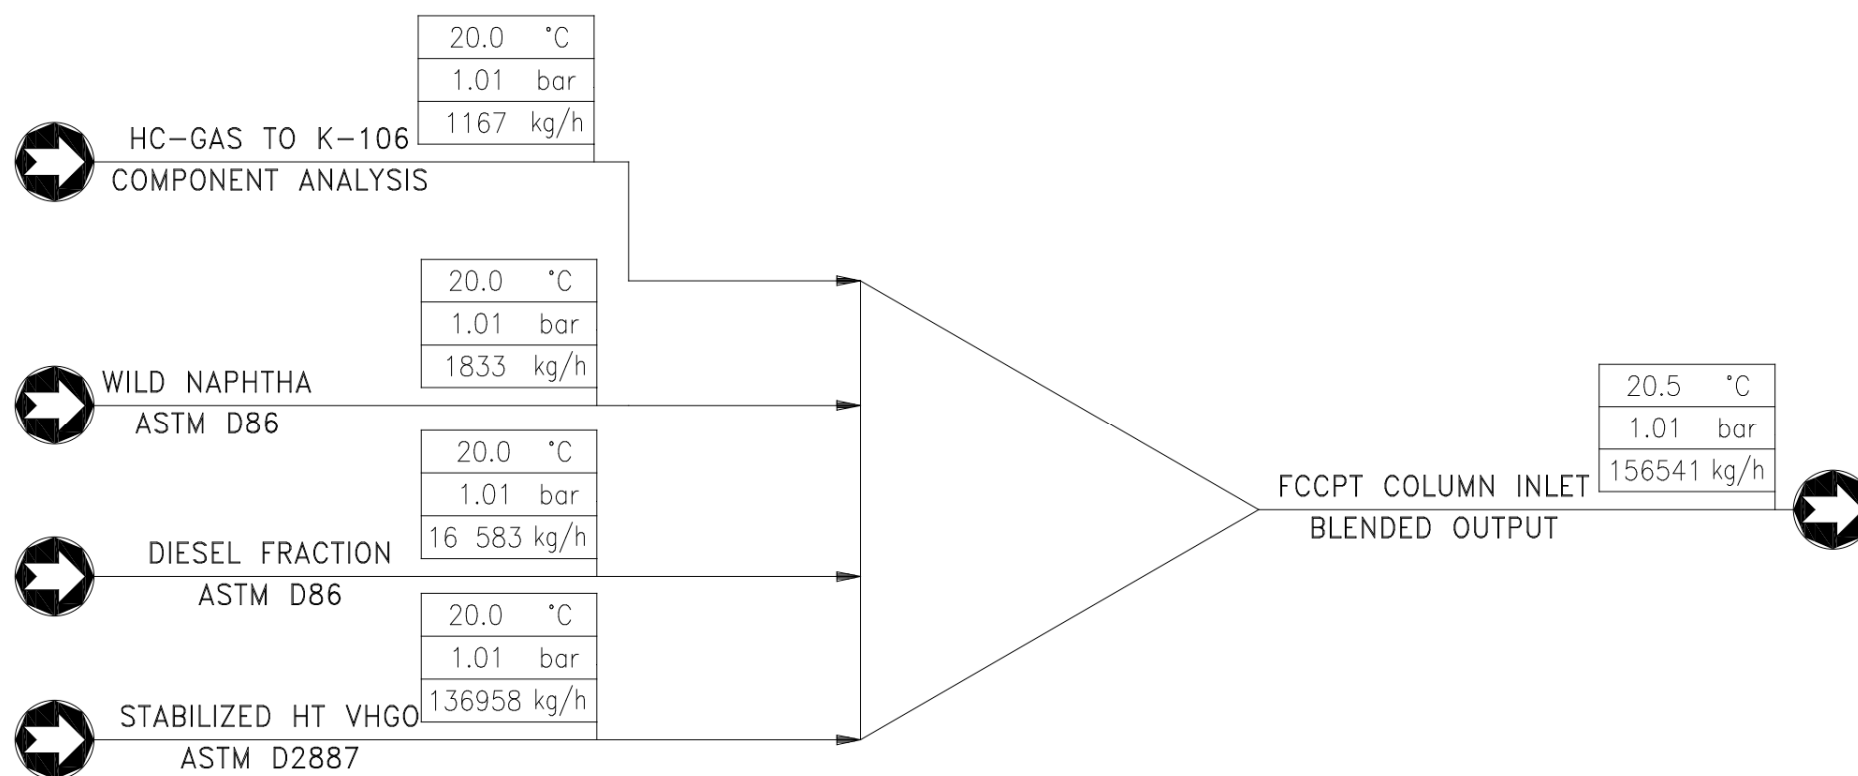

**Note:** K-106 is the Amine absorber for sweetening the hydrocarbon gas leaving FCCPT stabilization column

**Figure S2:** Simulation Flow diagram for performing Heat and Material balance for Simulation Case 1 with calculated (assumed) process variables vs instrument readings

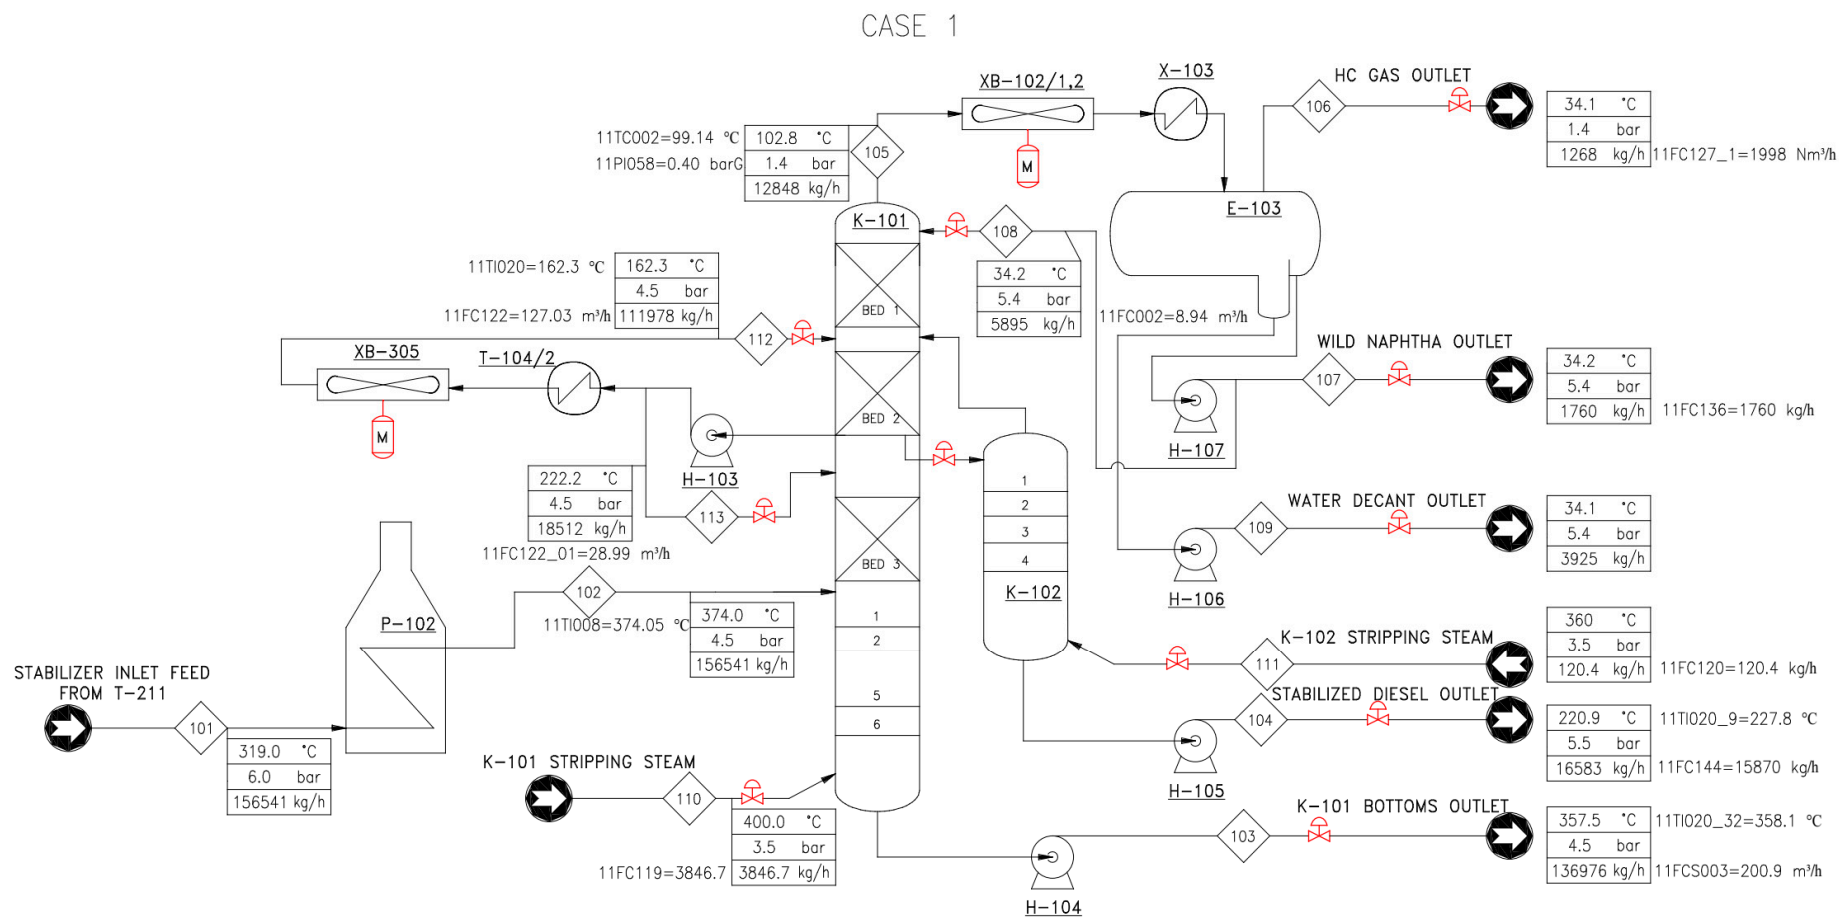

**Figure S3:** FCCPT Stabilization Section outlet stream summation to make-up the K-101 feed composition for Simulation Case 2.  
The characterization of the H-Oil VGO Blend and the Stabilized HTVGO is based on ASTM D 1160.

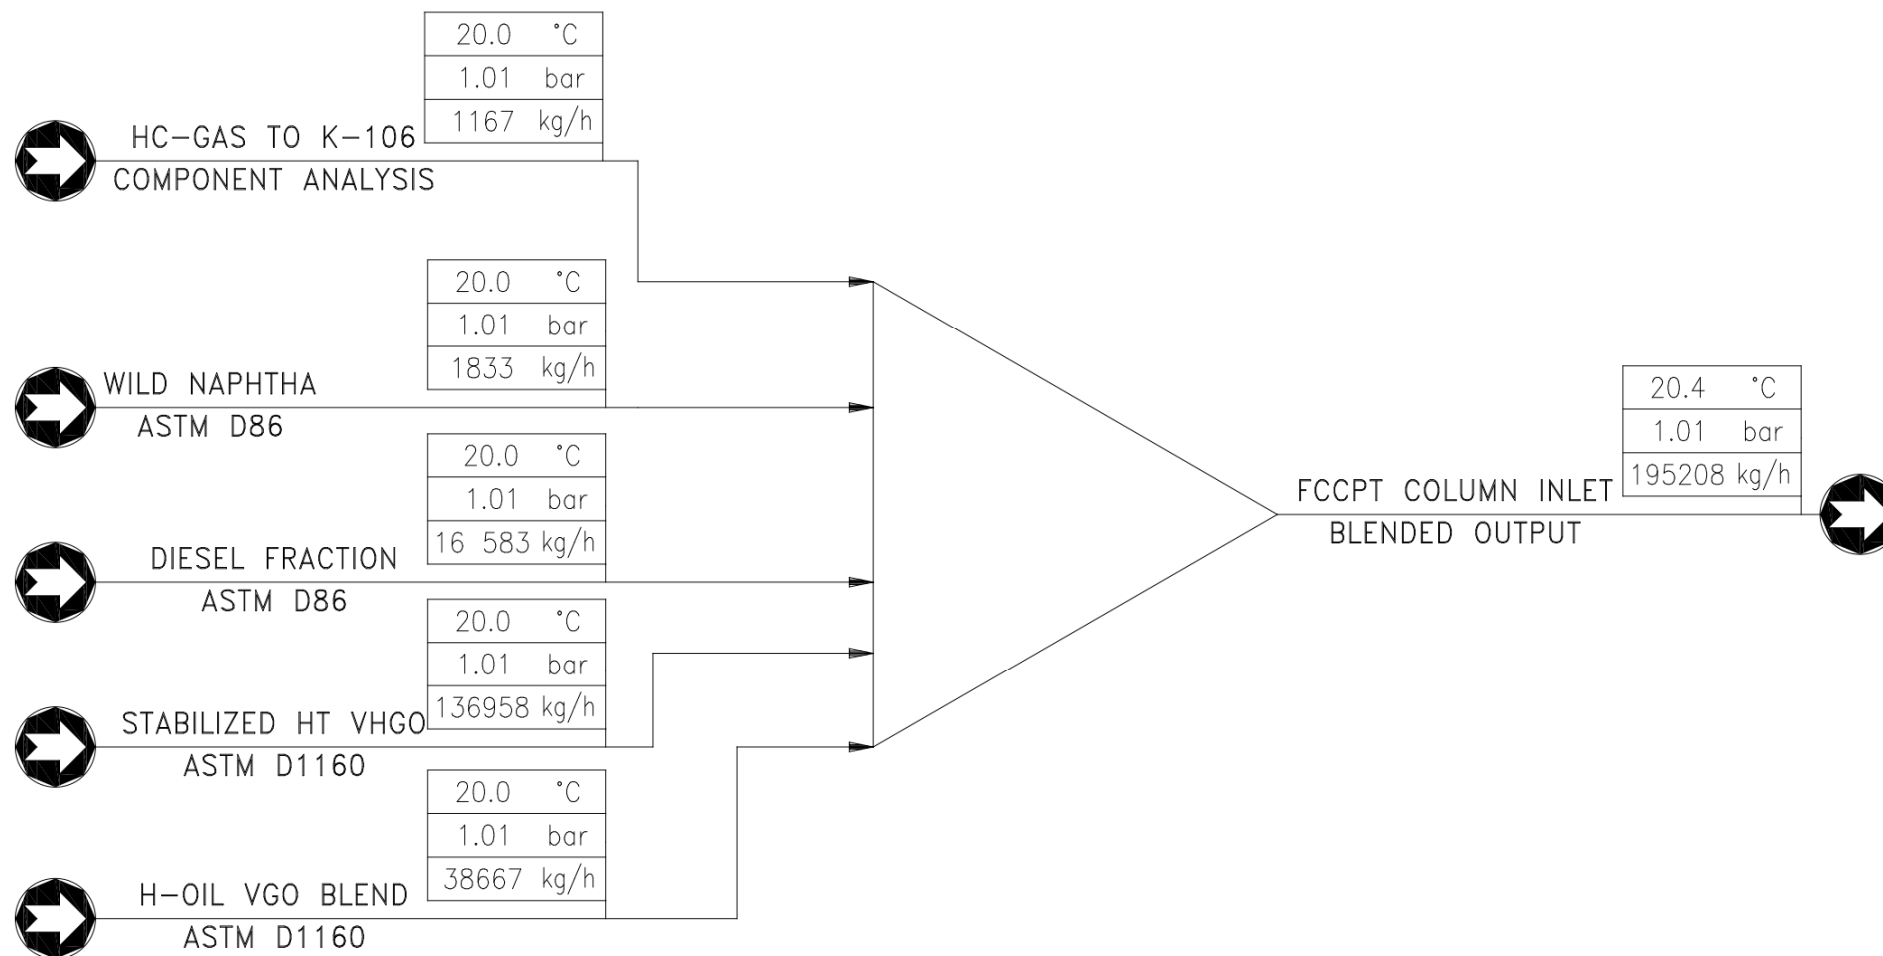

**Figure S4:** Simulation Flow diagram for performing Heat and Material balance for Simulation Case 2 – ASTM D 1160 with calculated (assumed) process variables vs instrument readings

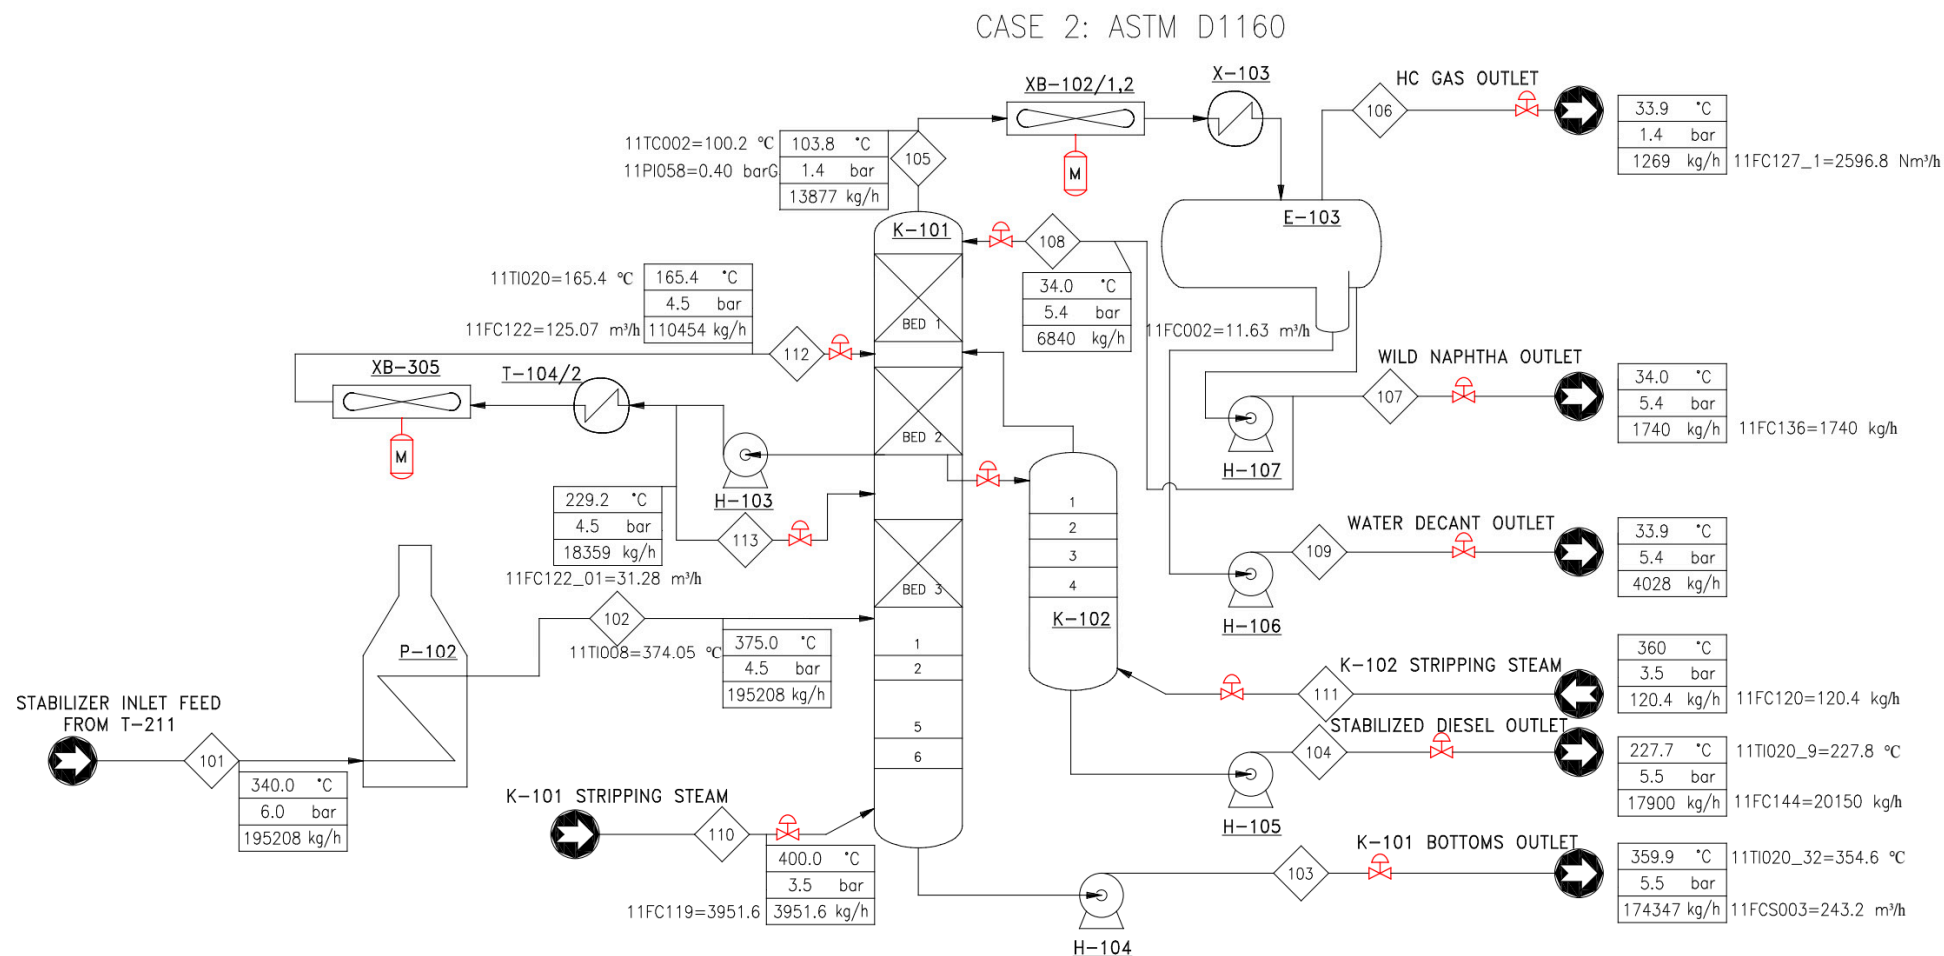

**Figure S5:** FCCPT Stabilization Section outlet stream summation to make-up the K-101 feed composition for Simulation Case 3.  
The characterization of the H-Oil VGO Blend and the Stabilized HTVGO is based on ASTM D 7169.

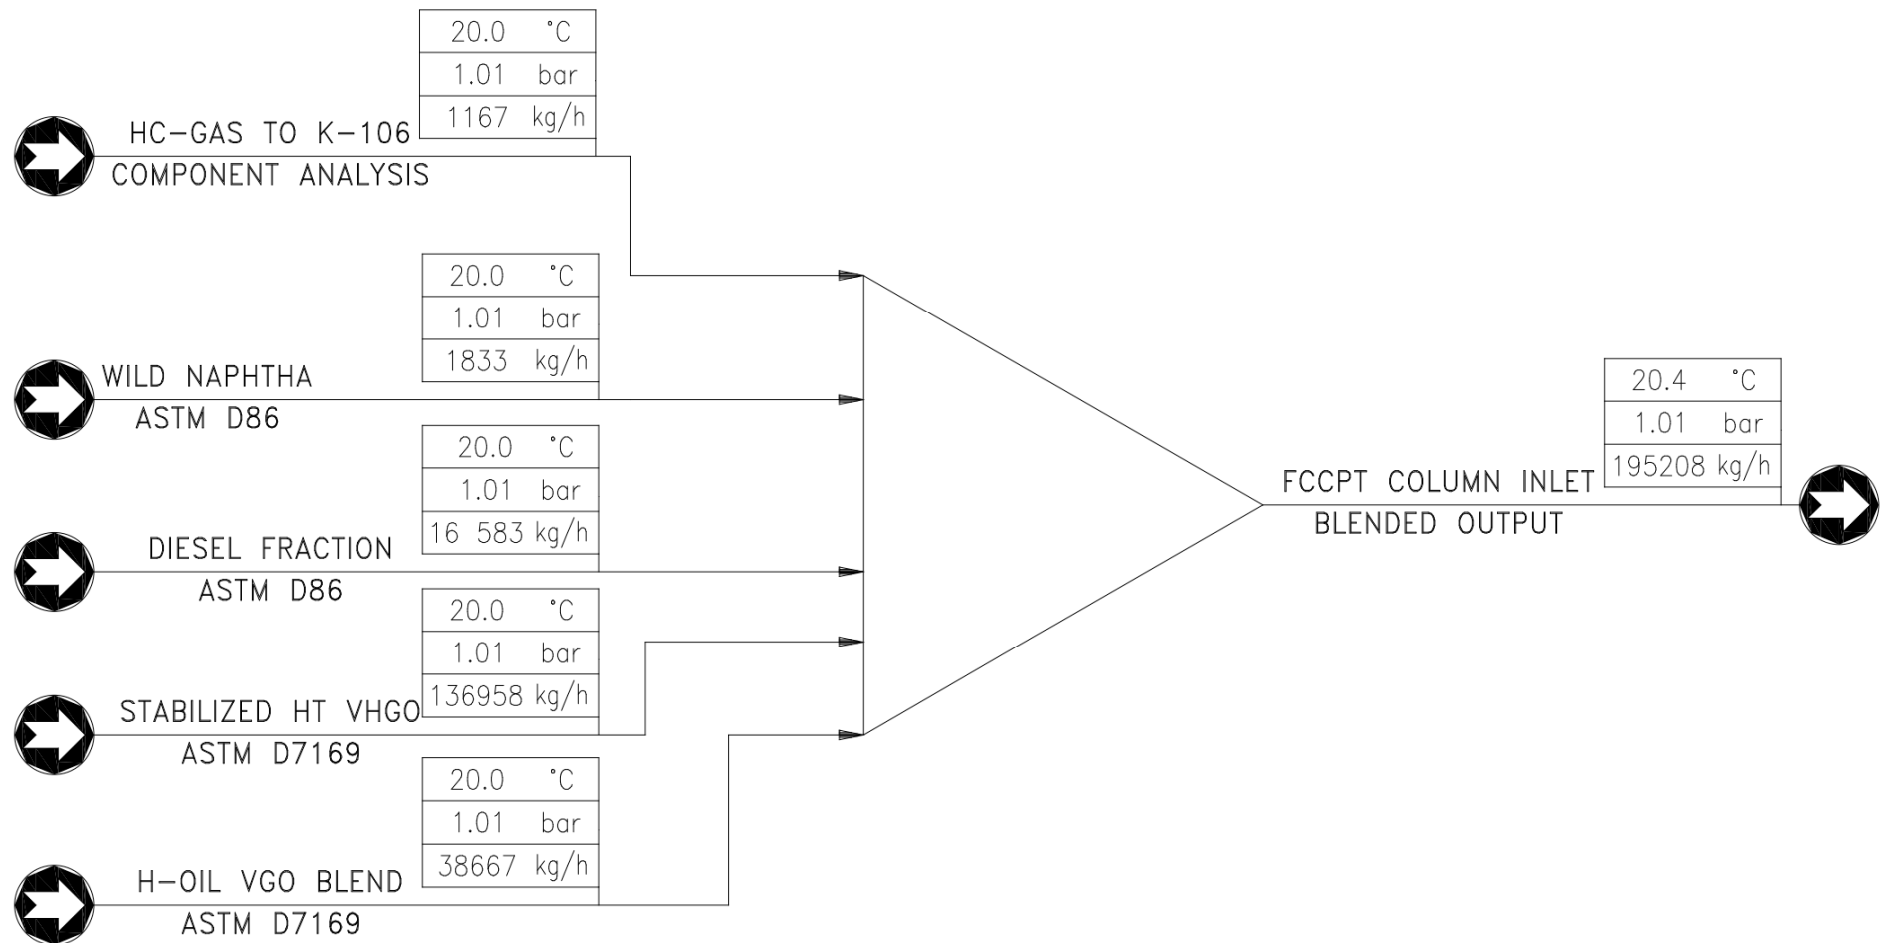

**Figure S6:** Simulation Flow diagram for performing Heat and Material balance for Simulation Case 3 – ASTM D 7169 with calculated (assumed) process variables vs instrument readings

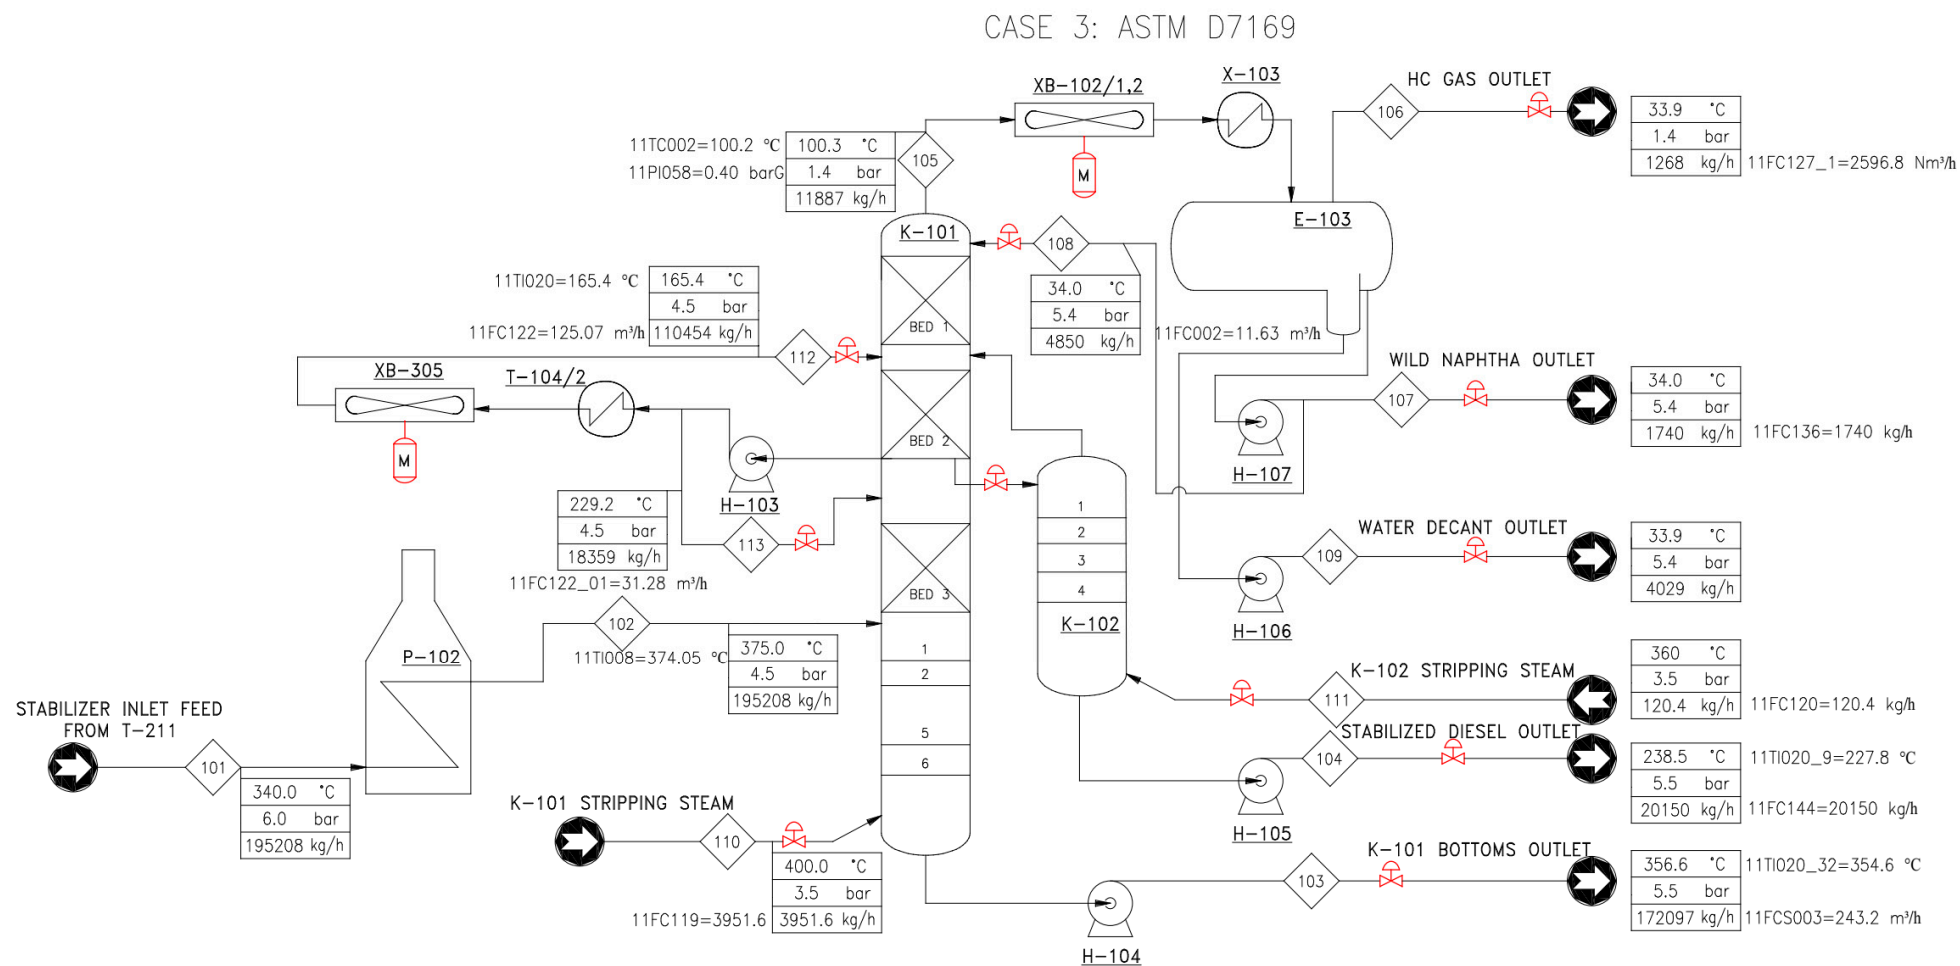

**Table S1.** Properties of wild naphtha from the FCC hydrotreating section (FCC pretreater) for both studied cases

| FCCPT wild naphtha product                              |                   |        |        |
|---------------------------------------------------------|-------------------|--------|--------|
| Indices/method                                          | Unit              | Value  |        |
|                                                         |                   | Case 1 | Case 2 |
| Density at 15°C / BDS EN ISO 3675                       | kg/m <sup>3</sup> | 766    | 759.4  |
| Distillation BDS EN ISO 3405 ( equivalent to ASTM D 86) |                   |        |        |
| Initial boiling point                                   | °C                | 37.8   | 38.5   |
| 5%                                                      | °C                | 83.5   | 85.8   |
| 10%                                                     | °C                | 96.1   | 95.3   |
| 50%                                                     | °C                | 133.6  | 129.8  |
| 90%                                                     | °C                | 169.9  | 163.8  |
| 95%                                                     | °C                | 178.5  | 170.9  |
| Final boiling point                                     | °C                | 194.8  | 178.3  |
| Recovery                                                | % (v/v)           | 98.5   | 97.8   |

**Table S2.** Properties of diesel fraction from the FCC hydrotreating section (FCC pretreater) for both studied cases

| FCCPT diesel fraction product                           |                   |        |        |
|---------------------------------------------------------|-------------------|--------|--------|
| Indices/method                                          | Unit              | Value  |        |
|                                                         |                   | Case 1 | Case 2 |
| Density at 15°C / BDS EN ISO 3675                       | kg/m <sup>3</sup> | 891.2  | 889.4  |
| Sulphur content / ASTM D 4294                           | %m/m              | 0.0301 | 0.105  |
| Distillation BDS EN ISO 3405 ( equivalent to ASTM D 86) |                   |        |        |
| Initial boiling point                                   | °C                | 220.6  | 217.6  |
| 5%                                                      | °C                | 242.1  | 241.3  |
| 10%                                                     | °C                | 255.4  | 255.2  |
| 50%                                                     | °C                | 321.4  | 323.6  |
| 90%                                                     | °C                | 355.9  | 356.4  |
| 95%                                                     | °C                | -      | 364.8  |
| boiling ≤ 360°C                                         | % (v/v)           | 92.3   | 92.4   |

**Table S3.** Properties of stable hydrotreated VGO from the FCC hydrotreating section (FCC pretreater) for both studied cases

| FCCPT Stable hydrotreated VGO           |                   |        |        |
|-----------------------------------------|-------------------|--------|--------|
| Indices/method                          | Unit              | Value  |        |
|                                         |                   | Case 1 | Case 2 |
| Micro carbon content / BDS EN ISO 10370 | % (m/m)           |        | 0,12   |
| Density at 15°C / BDS EN ISO 3675       | kg/m <sup>3</sup> | 901.1  | 910    |
| Sulphur content / ASTM D 4294           | % (m/m)           | 0.085  | 0.207  |
| Distillation / ASTM D 2887ext           |                   |        |        |
| 5%                                      | °C                | 353    | 351    |
| 10%                                     | °C                | 371    | 366    |
| 50%                                     | °C                | 440    | 434    |
| 90%                                     | °C                | 517    | 513    |
| 95%                                     | °C                | 536    | 531    |

**Table S4.** Properties of hydrocarbon gas product from the FCC hydrotreating section (FCC pretreater) for both studied cases

| Method                                          | Property                                | Case 1 | Case 2 |
|-------------------------------------------------|-----------------------------------------|--------|--------|
| BDS EN ISO 6976                                 | density at 20°C, kg/m <sup>3</sup>      | 1,223  | 1,239  |
| In-house method                                 | Hydrogen, % (v/v)                       | 23,7   | 23,1   |
| In-house gas chromatograph method               | CO <sub>2</sub> , % (v/v)               | <0.1   | <0.1   |
|                                                 | Oxygen, % (v/v)                         | 0.5    | 0.5    |
|                                                 | Nitrogen, % (v/v)                       | 1.7    | 1.8    |
|                                                 | CH <sub>4</sub> , % (v/v)               | 22.3   | 21.8   |
|                                                 | CO, % (v/v)                             | <0.1   | <0.1   |
| In-house gas chromatograph method               | C <sub>2</sub> H <sub>6</sub> , % (v/v) | 17.6   | 17.8   |
|                                                 | C <sub>2</sub> H <sub>4</sub> , % (v/v) | <0.1   | <0.1   |
|                                                 | C <sub>3</sub> H <sub>8</sub> , % (v/v) | 15.9   | 16.6   |
|                                                 | C <sub>3</sub> H <sub>6</sub> , % (v/v) | 0.1    | <0.1   |
|                                                 | Σ C <sub>4</sub> hydrocarbons, % (v/v)  | 10.2   | 10.5   |
|                                                 | Σ C <sub>5</sub> hydrocarbons, % (v/v)  | 4.6    | 4.7    |
|                                                 | Σ C <sub>6</sub> hydrocarbons, % (v/v)  | 3.4    | 3.2    |
| Sulphur components, total sulphur / ASTM D 5504 | H <sub>2</sub> S, ppm (v/v)             | -      | 0.9    |
|                                                 | Σ Sulphur compounds, ppm (v/v)          | -      | 8.5    |



**Table S5.** Properties of FCCPT vacuum gas oil feed for both studied cases

| VGO feed for FCCPT unit                 |                   |        |        |
|-----------------------------------------|-------------------|--------|--------|
| Indices/method                          | Unit              | Value  |        |
|                                         |                   | Case 1 | Case 2 |
| Density at 15°C / BDS EN ISO 3675       | kg/m <sup>3</sup> | 923.9  | 927.3  |
| Sulphur content / ASTM D 4294           | %m/m              | 2.05   | 2.08   |
| Micro carbon content / BDS EN ISO 10370 | % (m/m)           | 0.34   | 0.37   |
| Distillation / ASTM D 2887ext           |                   |        |        |
| 5%. °C                                  | °C                | 354    | 354    |
| 10%. °C                                 | °C                | 372    | 372    |
| 50%. °C                                 | °C                | 445    | 444    |
| 90%. °C                                 | °C                | 525    | 523    |
| 95%. °C                                 | °C                | 542    | 540    |
